# Supplementary material for: Polymer dispersed liquid crystals-impregnated switchable thermochromic transparent woods with excellent ultraviolet blocking performance for smart windows
Source: Research Square preprint supplement (doi:10.21203/rs.3.rs-7088422/v1), 2025-07-18
Supplement: Supplementary file 1 [file 09fa17d7e2b949169fdf9a88.docx]

**Supplementary Information**

Polymer Dispersed Liquid Crystals-impregnated Switchable Thermochromic Transparent Woods with Excellent Ultraviolet Blocking Performance for Smart Windows

Cheng Ai Li1 · Jae Kyu Ahn1 · Hyeon Ji Jeong1 · Jang Hee Kim1 · Taeyoung Park1 · Do Kyoung Han2 · Jin Kim3 · Dong Ju Lee4 · Sung Ho Song1

Cheng Ai Li and Jae Kyu Ahn contributed equally to this work.

Jin Kim

jinnie.kim@hanbat.ac.kr

Dong Ju Lee

dongjulee@chungbuk.ac.kr

Sung Ho Song

shsong805@kongju.ac.kr

1 Division of Advanced Materials Engineering, Center for Advanced Materials and Parts of Powders, Kongju National University, Cheonan-si 31080, Republic of Korea

2 Division of Materials Analysis and Research, Korea Basic Science Institute, 169–148, Gwahak-ro, Yuseong-Gu, Daejeon 34133, Republic of Korea

Department of Chemistry, Chung-Ang University, Seoul 06974, Republic of Korea

3 Department of Materials Science and Engineering, Hanbat National University, Daejeon 34158, Republic of Korea

4 Department of Urban, Energy, and Environmental Engineering, Chungbuk National University, Cheongju 28644, Republic of Korea


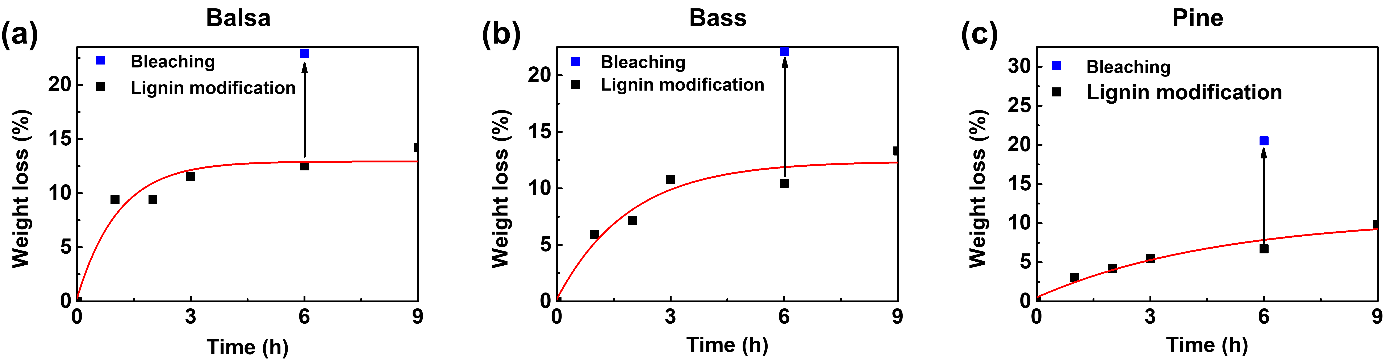


**Figure S1.** Weight loss after lignin modification and bleaching. (a) balsa, (b) bass, and (c) pine woods.


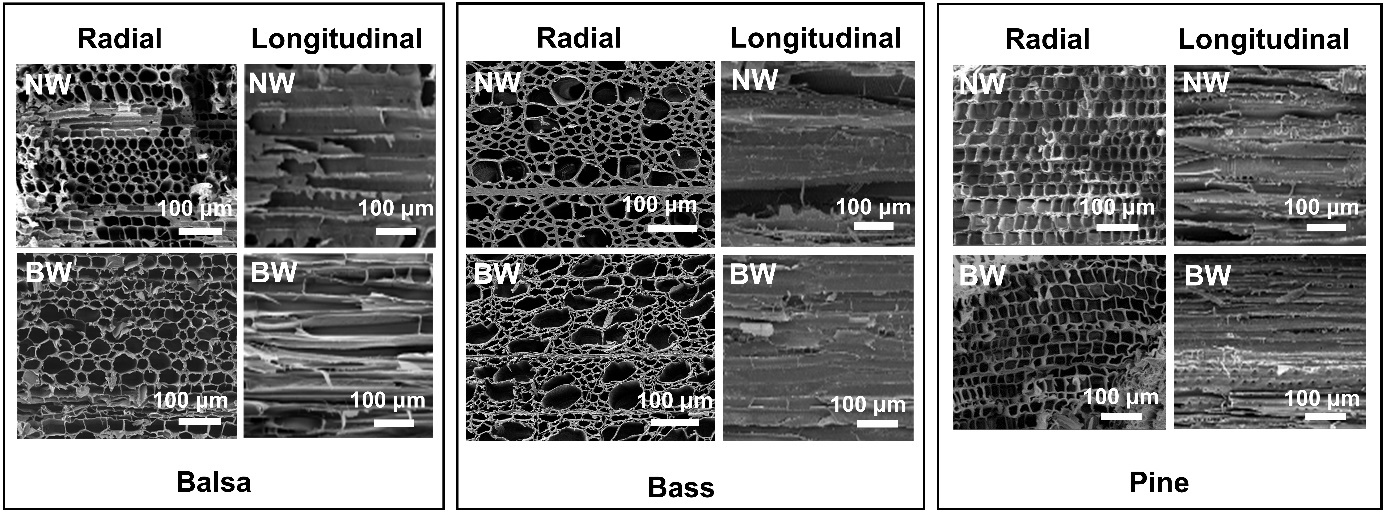


**Figure S2.** SEM images of balsa, bass, and pine NWs and BWs.


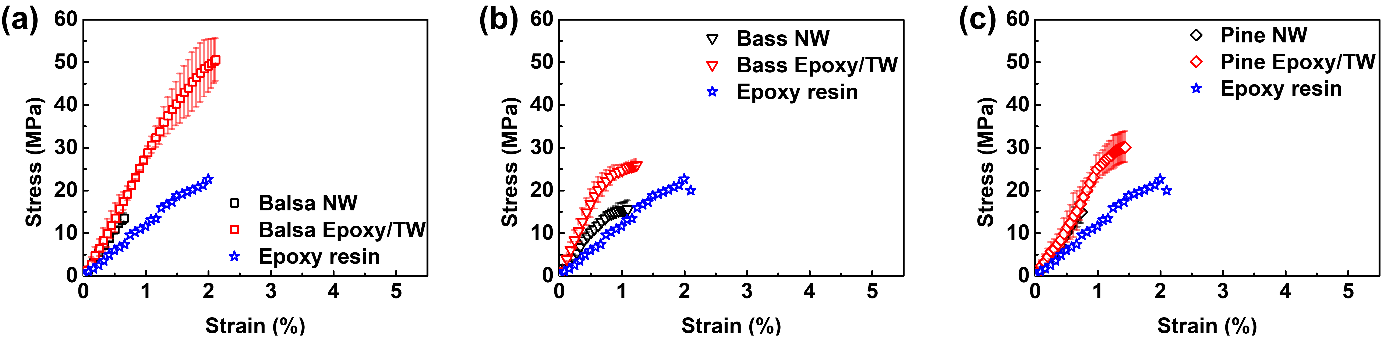


**Figure S3.** Experimental stress-strain curves of epoxy, NWs, and Epoxy/TWs using (a) balsa, (b) bass, and (c) pine woods.


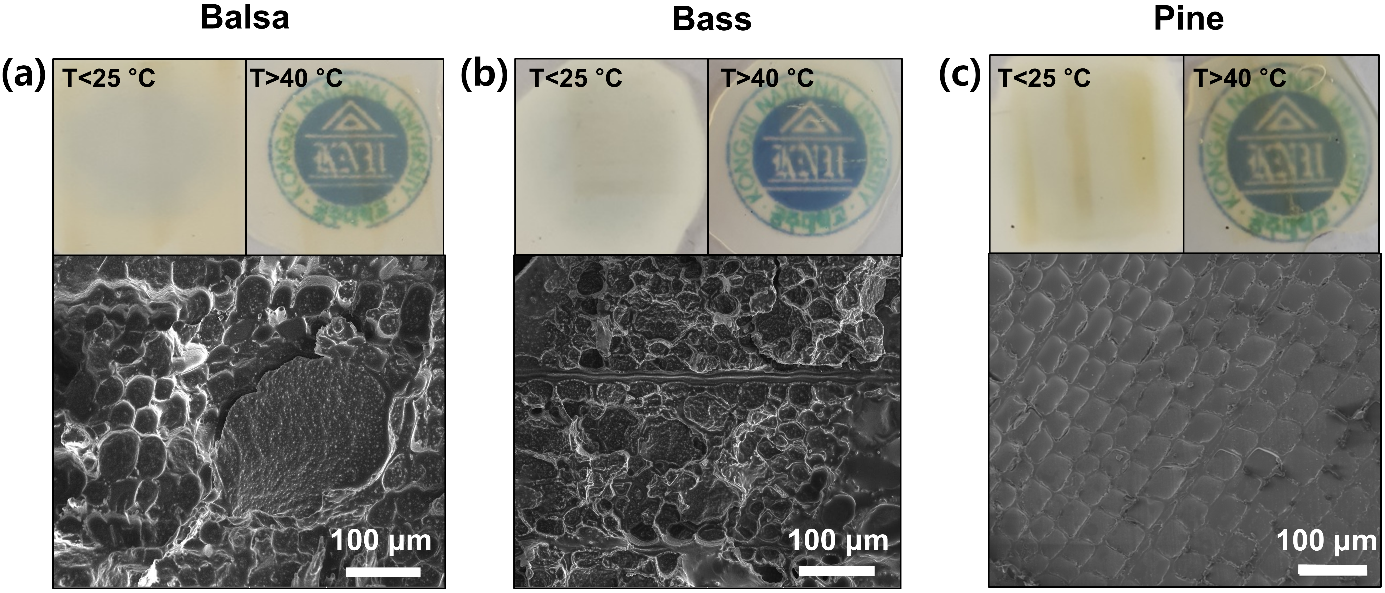


**Figure S4.** Images of PDLC/TWs below 25 oC and above 40 oC and SEM images of PDLC/TWs. (a) balsa, (b) bass, and (c) pine PDLC/TWs.


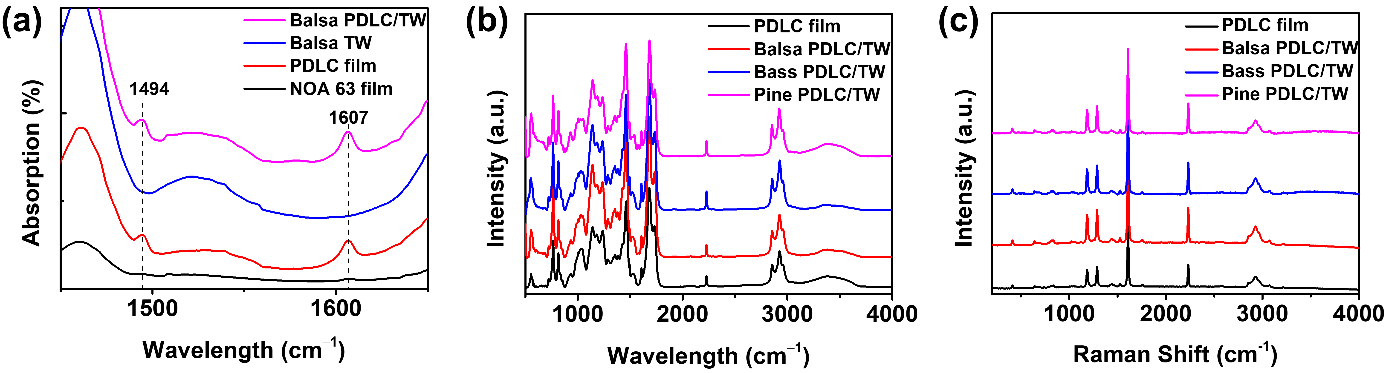


**Figure S5.** (a) Enlarged view of the FTIR curves between 1450 and 1650 cm−1 in Figure 4d. (b) FTIR and (c) Raman spectra of balsa, bass, and pine PDLC/TWs.


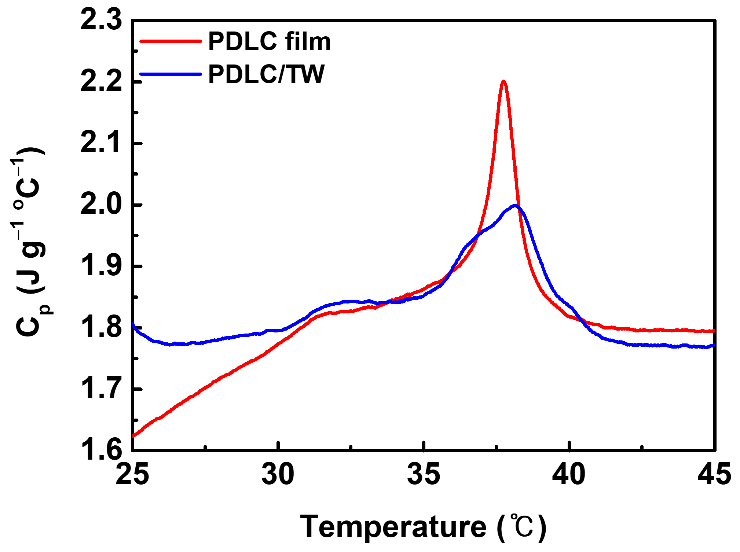


**Figure S6.** DSC spectra of PDLC film and PDLC/TW.


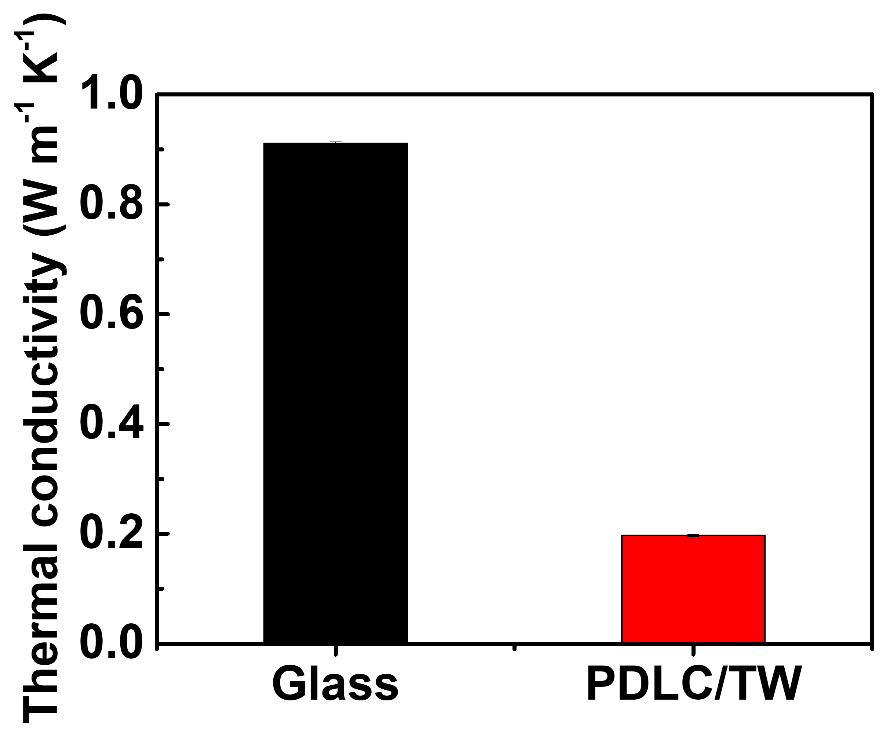


**Figure S7.** Comparison of the thermal conductivities of glass and PDLC/TW.
